# Supplementary material
Source: PubMed Central journal article supplement (PMC6343492)
Supplement: NIHMS1500709-supplement-2.pdf [file NIHMS1500709-supplement-2.pdf]

## Supplemental Figure 1

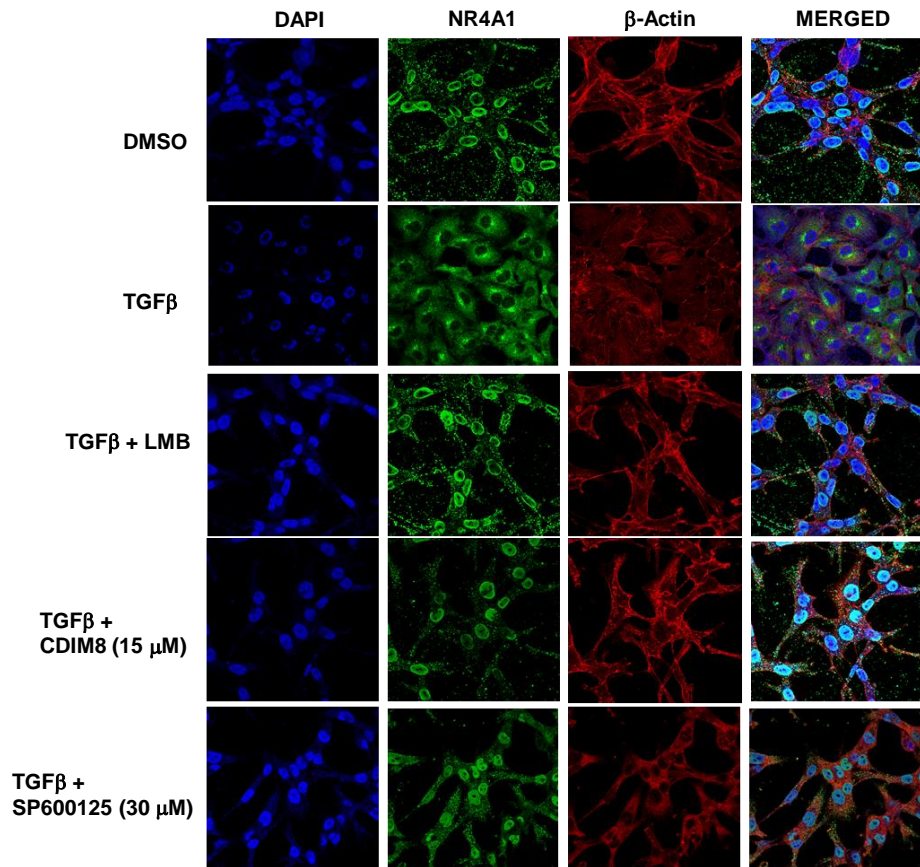

**Supplemental Figure 1.** Confocal microscopic analysis of TGF $\beta$ -induced nuclear export of NR4A1. A549 cells were treated with TGF $\beta$  (5 ng/ml) alone or in combination with LMB, CDIM8 and SP600125. Nuclear export of NR4A1 was determined by immunostaining and confocal microscopy as outlined in the Materials and Methods.
