# Supplementary material
Source: PubMed Central journal article supplement (PMC6343492)
Supplement: NIHMS1500709-supplement-4.pdf [file NIHMS1500709-supplement-4.pdf]

### Supplemental Figure 3

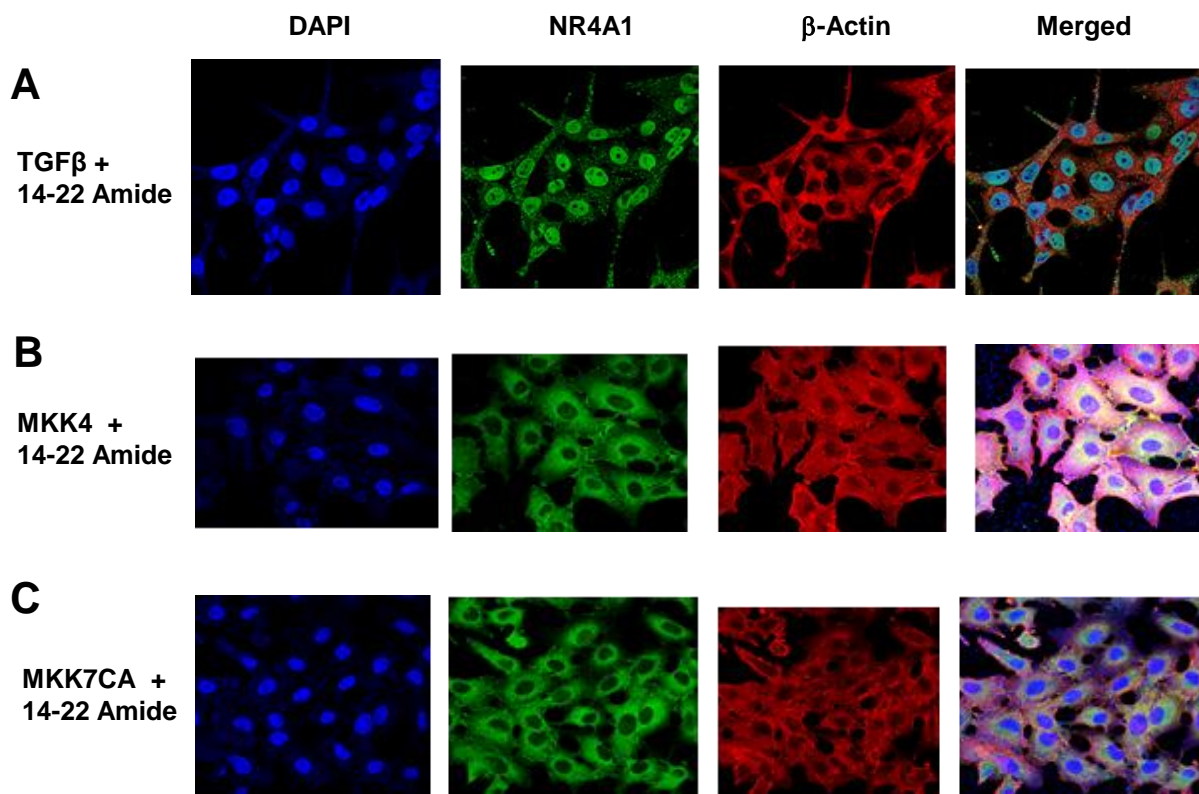

**Supplemental Figure 3.** PKA inhibition affects nuclear export of NR4A1 in A549 cells. Cells were treated with TGF $\beta$  or transfected with MKK4 and MKK7(CA) and treated with 14-22 Amide and analyzed by confocal microscopy as outlined in the Materials and Methods.
